# Supplementary material
Source: Springer Nature journal article supplement (https://www.springermedizin.de/resource/supplementary/12885_2009_2570_MOESM9_ESM.pdf/9462584)

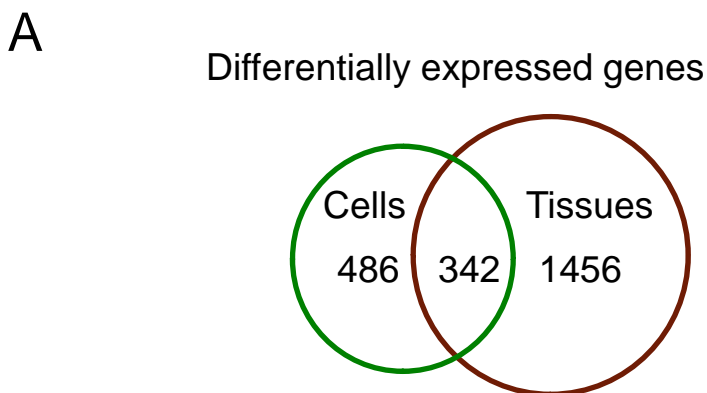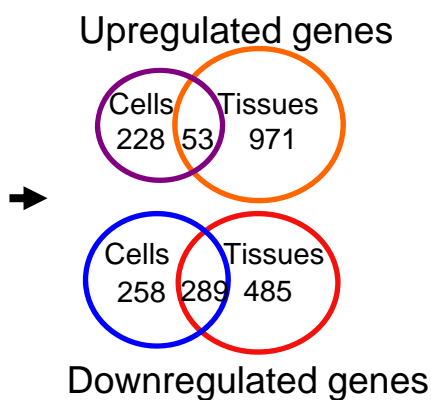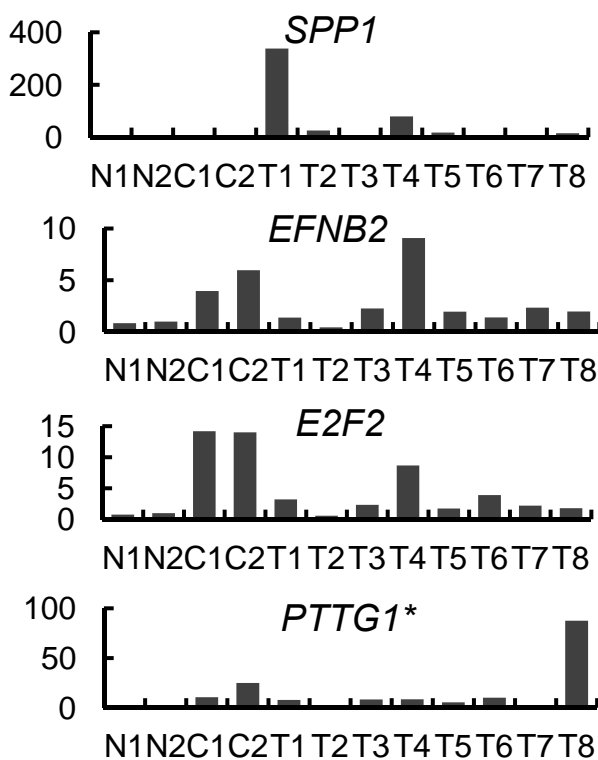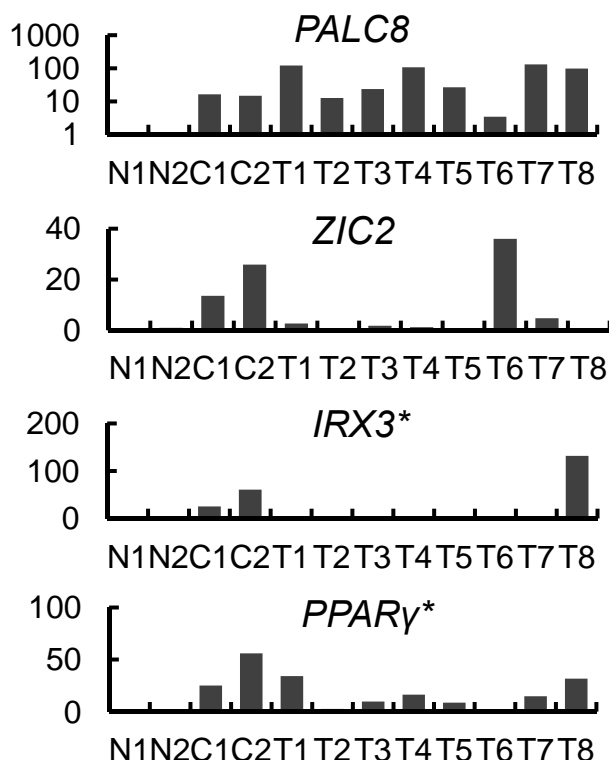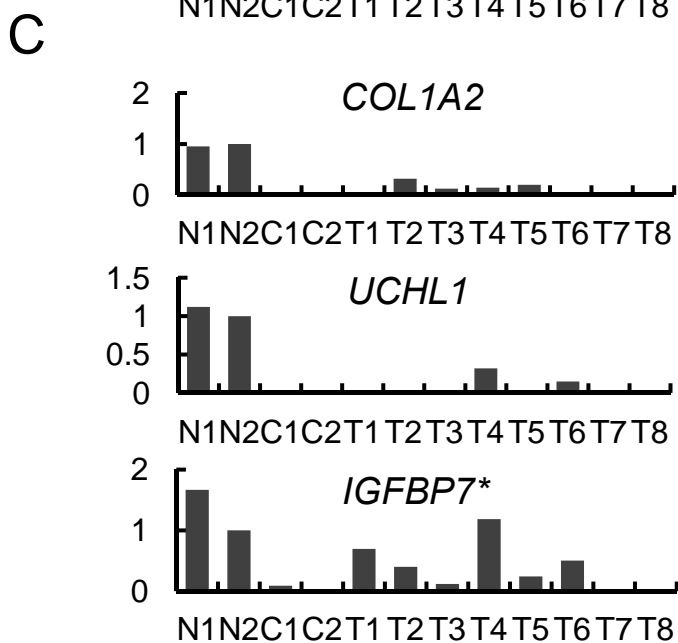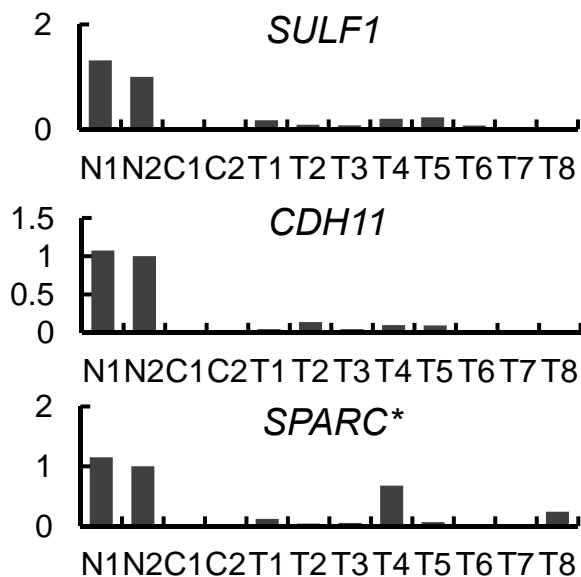

Supplement: MOESM9 [file 9462584]
